# Supplementary material for: Self-assembly of [2]pseudorotaxanes based on pillar[5]arene and bis(imidazolium) cations
Source: Royal Society of Chemistry journal article supplement (doi:10.1039/c0cc03575k), 2010-01-01
Supplement: c0cc03575k.pdf [file c0cc03575k.pdf]

## Electronic supplementary information

# Self-Assembly of [2]Pseudorotaxanes Based on Pillar[5]arene and Bis(imidazolium) Cations

Chunju Li,<sup>\*a</sup> Liu Zhao,<sup>a</sup> Jian Li,<sup>a</sup> Xia Ding<sup>b</sup>, Songhui Chen,<sup>a</sup> Qiaolin Zhang<sup>a</sup>, Yihua Yu<sup>b</sup> and Xueshun Jia<sup>\*a</sup>

<sup>a</sup> *Department of Chemistry, Shanghai University, Shanghai, 200444, P. R.China*

*E-mail: cjli@shu.edu.cn, xsjia@mail.shu.edu.cn*

<sup>b</sup> *Shanghai Key Laboratory of Magnetic Resonance, Department of Physics, East China Normal University, Shanghai, 200062, P. R. China.*

## Contents

|                                                                                                       |     |
|-------------------------------------------------------------------------------------------------------|-----|
| Re-design of bis(imidazolium) and bis(benzimidazolium) axles.                                         | S2  |
| Synthesis.                                                                                            | S3  |
| Copies of <sup>1</sup> H NMR and <sup>13</sup> C NMR spectra of guests.                               | S6  |
| <sup>1</sup> H NMR spectra of guests in the absence and presence of <b>P5A</b> in different solvents. | S10 |
| 2D NOESY analysis of [1-2H]•2PF <sub>6</sub> with <b>P5A</b> .                                        | S14 |
| DOSY spectra.                                                                                         | S15 |
| ESI mass spectrum of [1-2H]•2PF <sub>6</sub> and 2•2PF <sub>6</sub> in the presence of <b>P5A</b> .   | S18 |
| Job plots of <b>P5A</b> /[1-2H]•2PF <sub>6</sub> and <b>P5A</b> /2•2PF <sub>6</sub> .                 | S19 |
| Determination of the association constants.                                                           | S19 |
| References                                                                                            | S24 |

### Re-design of bis(imidazolium) and bis(benzimidazolium) axles.

We were wondering if a similar dication, 1,4-bis(benzimidazolium)butane (**BBImB**<sup>2+</sup>, See Fig. S1), could penetrate the **P5A**'s cavity to produce [2]pseudorotaxane. However, no obvious NMR changes of the **BBImB** guest were observed upon addition of the host, (Fig. S17) indicating that **P5A** did not form inclusion complex with **BBImB**•2PF<sub>6</sub> or at least had very weak interaction. This is likely because benzimidazolium group was a little more bulky than imidazolium and pyridinium, and couldn't thread through the cavity of **P5A**.<sup>[S1,S2]</sup> (Fig. S1)

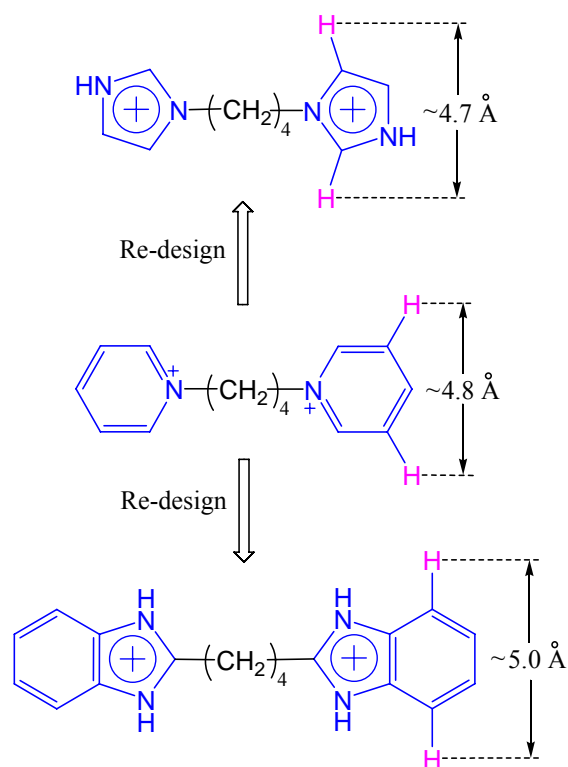

**Figure S1.** Re-design of bis(imidazolium) and bis(benzimidazolium) axles.

## Synthesis.

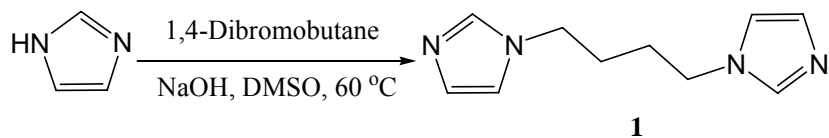

1,4-Bis(imidazole-1-yl)butane **1**<sup>[S5]</sup>: A mixture of imidazole (4.1 g, 60 mmol) and NaOH (2.4 g, 60 mmol) in DMSO (20 mL) was stirred at 60 °C for 2h, and then 1,4-dibromobutane (6.0 g, 28 mmol) was added. After stirring at 60 °C for 2 h, the reaction mixture was cooled to room temperature and then poured into 200 mL of water. A white solid formed immediately, which was isolated by filtration in 86% yield (4.1 g) after drying in air.

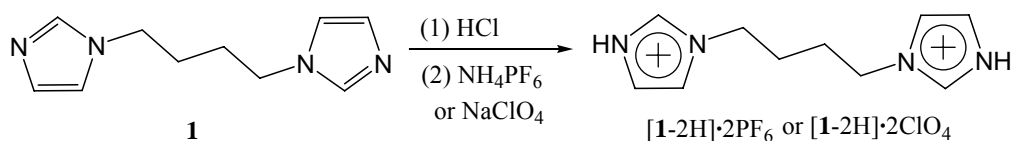

[**1-2H**] $\cdot$ 2Cl: To compound **1** (0.57 g, 3.0 mmol) dissolved in MeOH (10 mL) was added conc. HCl to adjust pH 1~2, and the solvent was then evaporated off under reduced pressure. The residue was washed with acetone (5 mL) and dried under reduced pressure to give [**1-2H**] $\cdot$ 2Cl as a white solid (0.75 g, 95%).

[**1-2H**] $\cdot$ 2PF<sub>6</sub> and [**1-2H**] $\cdot$ 2ClO<sub>4</sub>: [**1-2H**] $\cdot$ 2Cl (0.53 g, 2.0 mmol) was dissolved in deionized H<sub>2</sub>O (10 mL), and a saturated aqueous solution of NH<sub>4</sub>PF<sub>6</sub> or NaClO<sub>4</sub> was added until no further precipitation was observed. The mixture was then filtered, washed with deionized H<sub>2</sub>O (10 mL) and Et<sub>2</sub>O (3 mL) and dried under reduced pressure

to give  $[\mathbf{1-2H}]\cdot 2\text{PF}_6$  (0.85 g, 88%) or  $[\mathbf{1-2H}]\cdot 2\text{ClO}_4$  (0.48 g, 61%) as a white solid.

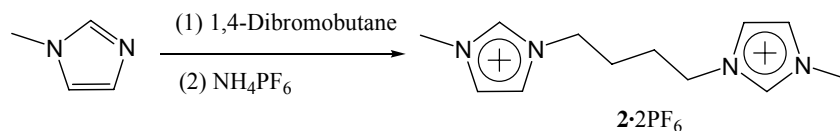

**2·2Br:** **2·2Br** was prepared according to the literature procedure.<sup>[S6]</sup>

1,4-Dibromobutane (2.16 g, 10.0 mmol) was mixed with 1-methylimidazole (1.80 g, 21.8 mmol) and the reaction mixture was kept at room temperature for 48 h. The resulting dark solid was crushed under acetone, filtered, washed with small portions of acetone and dried under reduced pressure, leaving **2·2Br** as yellow solid. (2.67 g, 70 % yield)

**2·2PF<sub>6</sub>:** The same procedure as for  $[\mathbf{1-2H}]\cdot 2\text{PF}_6$  was used. **2·2Br** (0.76 g, 2.0 mmol) in deionized H<sub>2</sub>O (10 mL) was added a saturated aqueous solution of NH<sub>4</sub>PF<sub>6</sub> to produce a white solid **2·2PF<sub>6</sub>** (0.93 g, 91 % yield).

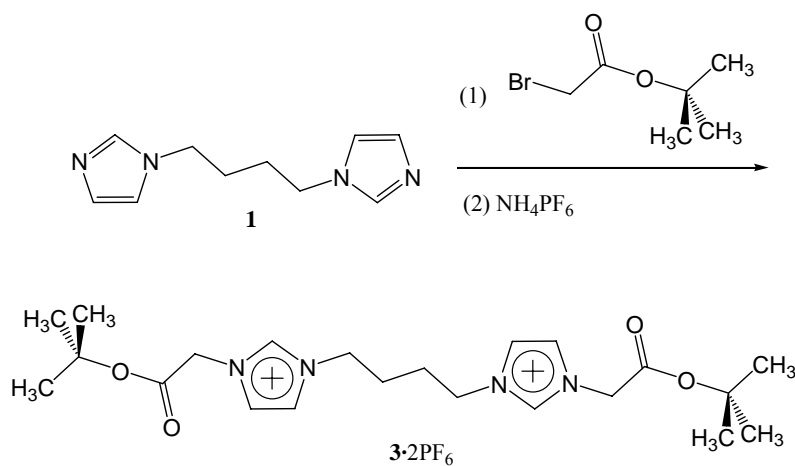

**3·2Br:** A solution of **1** (0.57 g, 3.0 mmol) and tert-Butyl bromoacetate (1.56 g, 8.0

mmol) in MeCN (6 mL) was refluxed for two days. The precipitate was then filtered, washed with tetrahydrofuran and dried to give **3·2Br** as colorless crystalline. (1.37 g, 78%)

**3·2PF<sub>6</sub>**: The same procedure as for **[1-2H]·2PF<sub>6</sub>** was used. **3·2Br** (1.17 g, 2.0 mmol) in deionized H<sub>2</sub>O (10 mL) was added a saturated aqueous solution of NH<sub>4</sub>PF<sub>6</sub> to produce **3·2PF<sub>6</sub>** (1.25 g, 87 % yield).

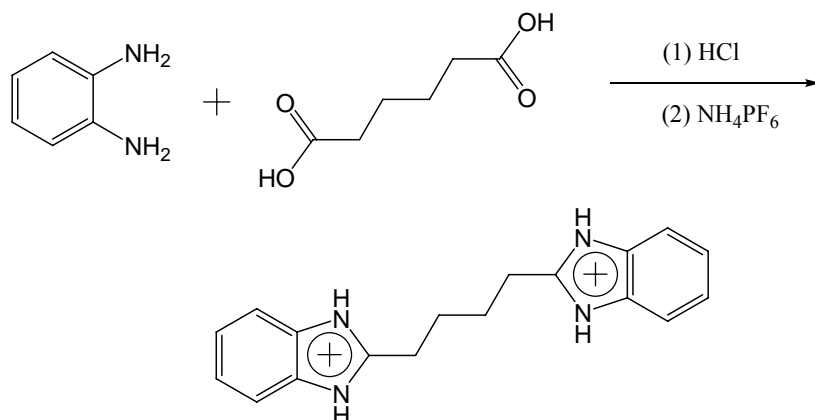

**BBImB·2PF<sub>6</sub>**.<sup>[S7]</sup> Phenylenediamine (5.4 g, 50 mmol) and adipic acid (3.65 g, 25 mmol) were added to 4M hydrochloric acid (60 mL), and the mixture was refluxed for 40 hours then gradually cooled to room temperature. The light green precipitate was filtered, washed with water then acetone and air dried to give **BBImB·2Cl**. **BBImB·2Cl** was dissolved in deionized H<sub>2</sub>O, and a saturated aqueous solution of NH<sub>4</sub>PF<sub>6</sub> was added until no further precipitation was observed. The mixture was then filtered, washed with H<sub>2</sub>O and Et<sub>2</sub>O and dried to give **BBImB·2PF<sub>6</sub>** as a white solid (10.3 g, 70 % yield).

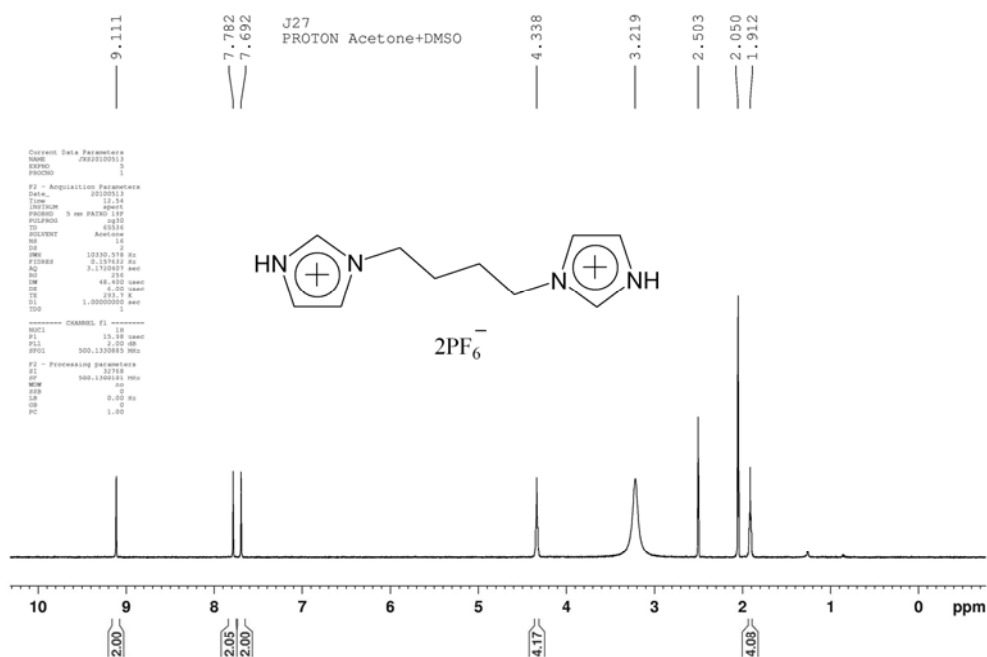

**Figure S2.**  $^1\text{H}$  NMR spectrum (500 MHz) of  $[\mathbf{1}\text{-}2\text{H}]\cdot 2\text{PF}_6$  in acetone- $d_6$  and DMSO- $d_6$  (3:2, v:v).

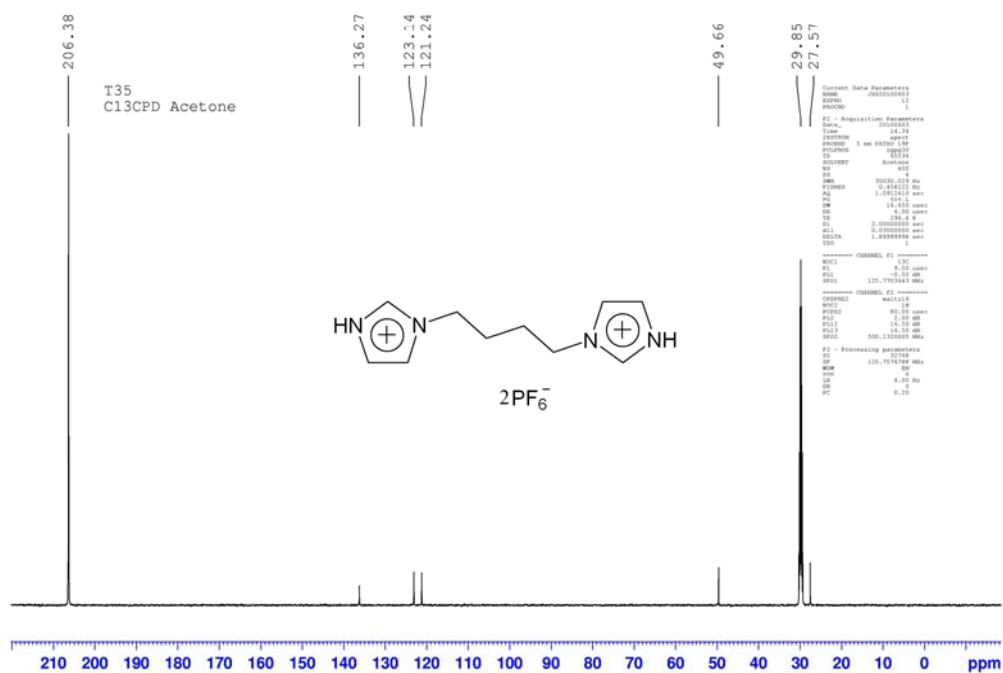

**Figure S3.**  $^{13}\text{C}$  NMR spectrum (500 MHz) of  $[\mathbf{1}\text{-}2\text{H}]\cdot 2\text{PF}_6$  in acetone- $d_6$ .

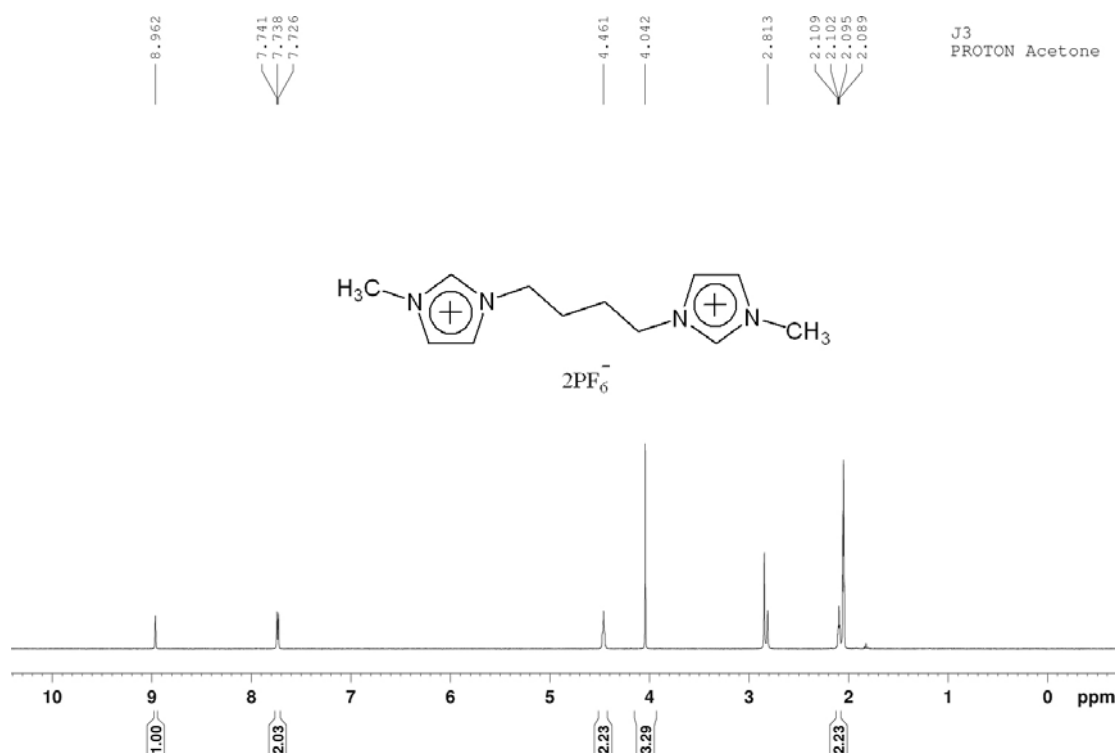

**Figure S4.** <sup>1</sup>H NMR spectrum (500 MHz) of 2·2PF<sub>6</sub> in acetone-*d*<sub>6</sub>.

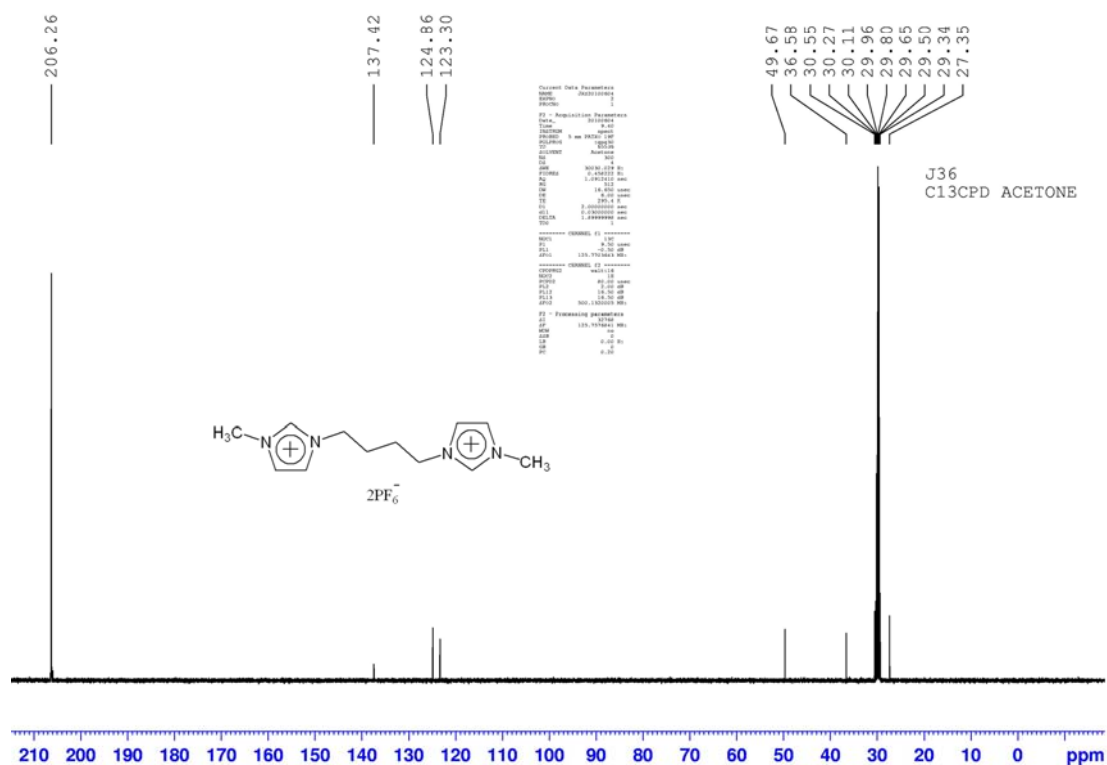

**Figure S5.** <sup>13</sup>C NMR spectrum (500 MHz) of 2·2PF<sub>6</sub> in acetone-*d*<sub>6</sub>.

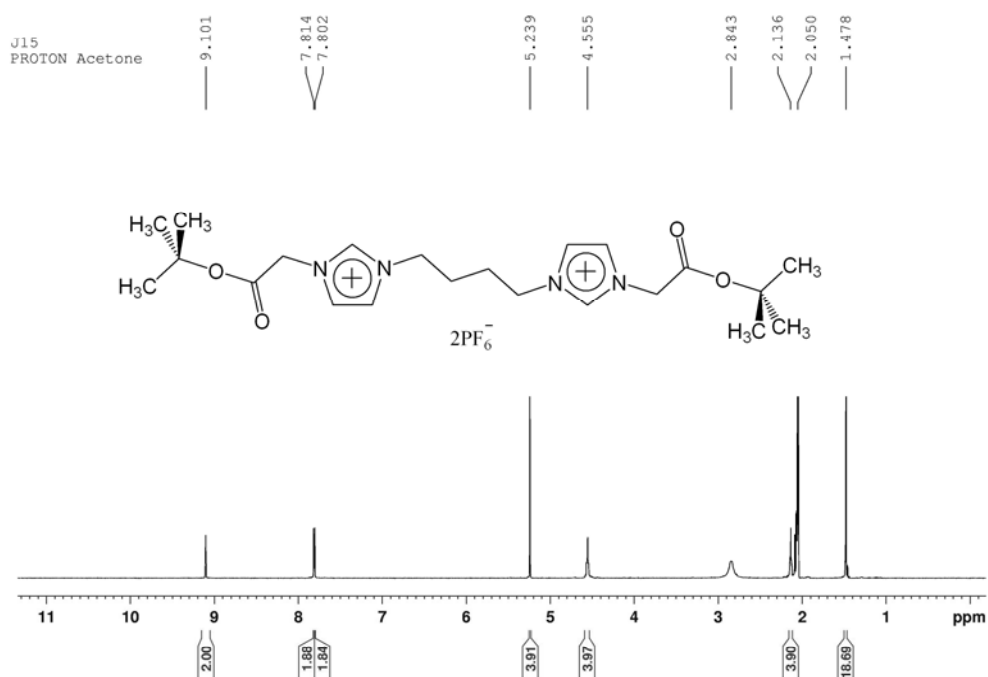

**Figure S6.** <sup>1</sup>H NMR spectrum (500 MHz) of **3**·2PF<sub>6</sub> in acetone-*d*<sub>6</sub>.

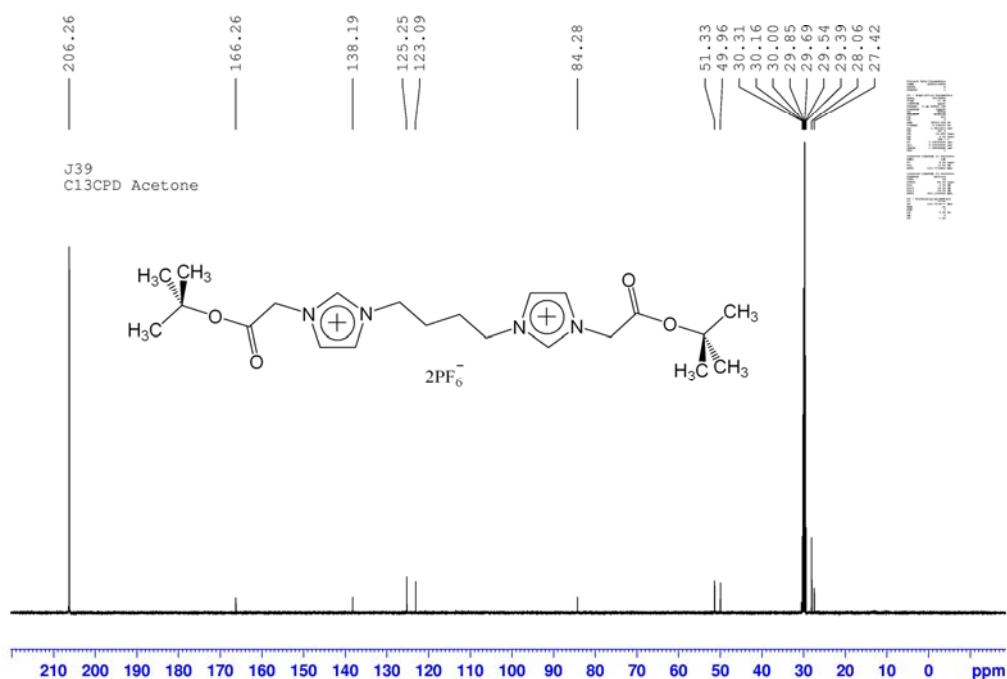

**Figure S7.** <sup>13</sup>C NMR spectrum (500 MHz) of **3**·2PF<sub>6</sub> in acetone-*d*<sub>6</sub>.



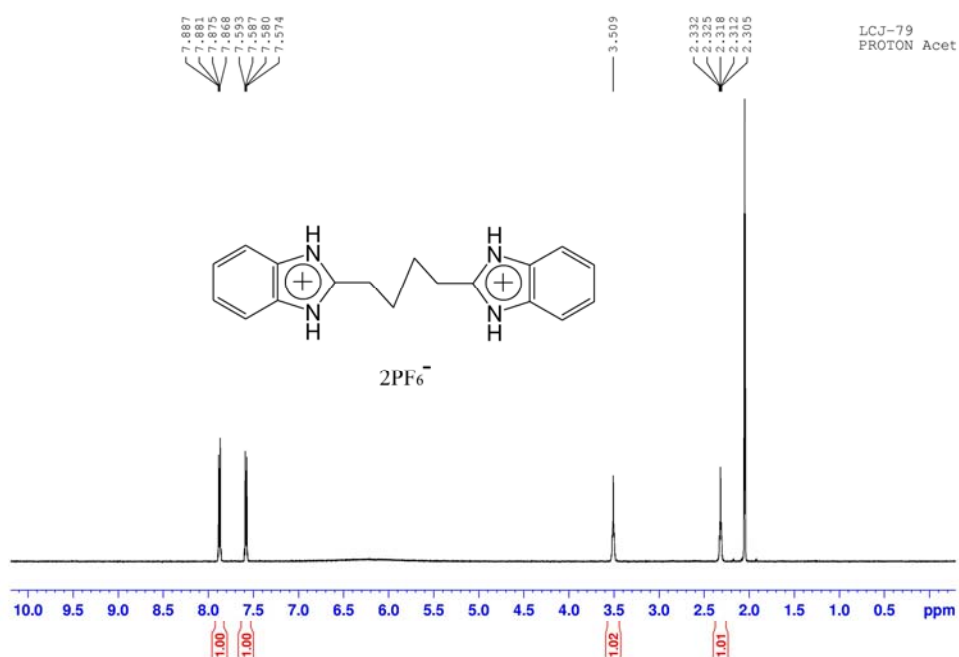

**Figure S8.**  $^1H$  NMR spectrum (500 MHz) of **BBImB**· $2PF_6$  in acetone- $d_6$ .

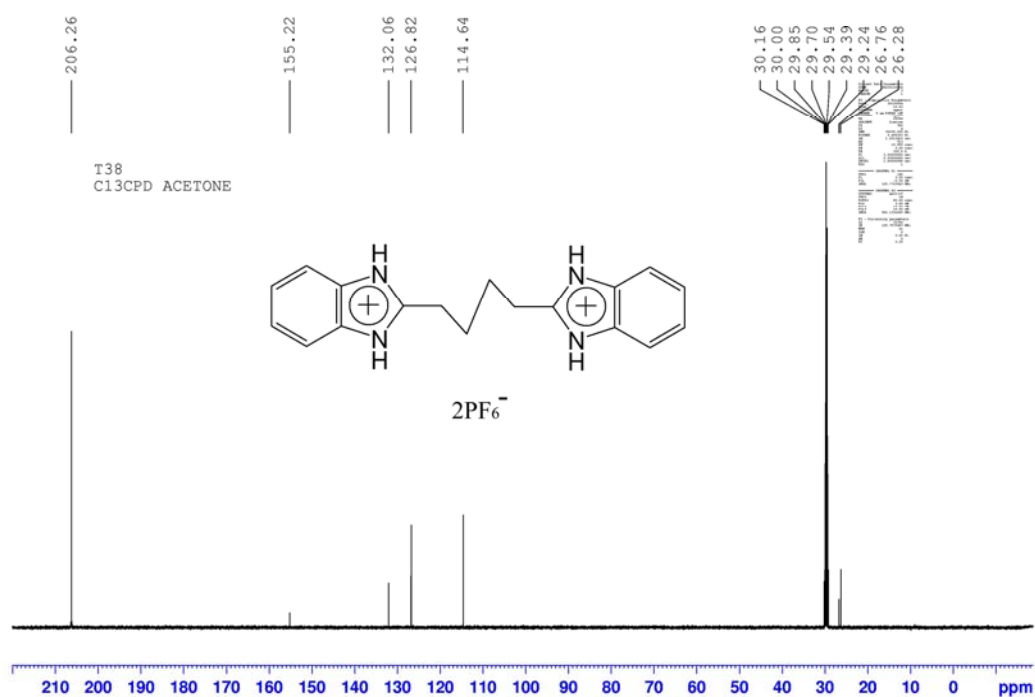

**Figure S9.**  $^{13}C$  NMR spectrum (500 MHz) of **BBImB**· $2PF_6$  in acetone- $d_6$ .

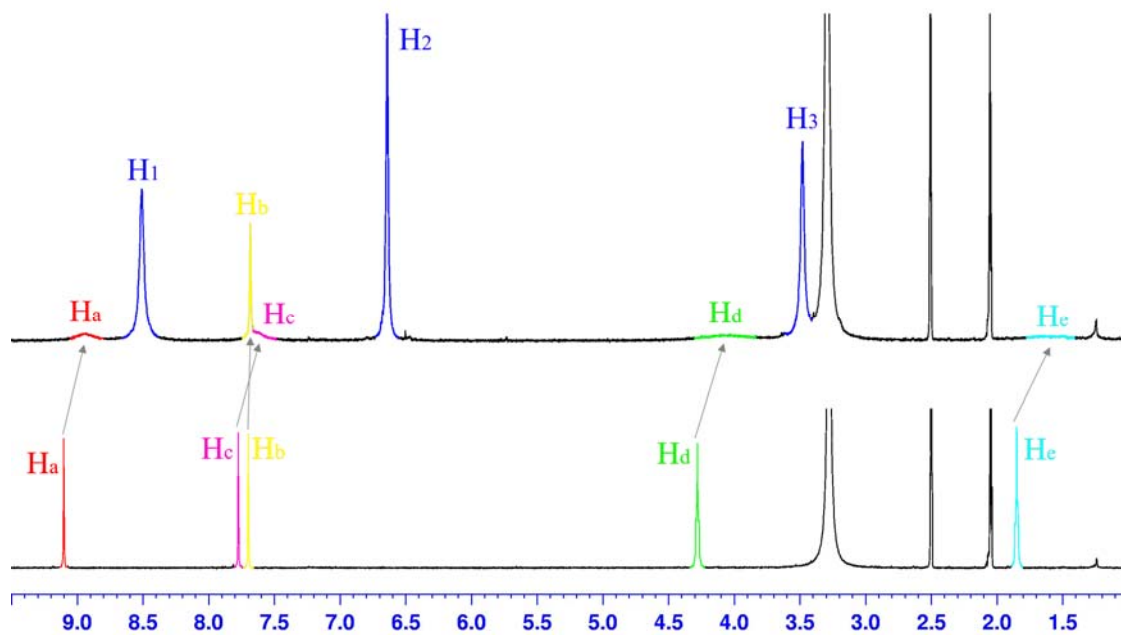

**Figure S10.** <sup>1</sup>H NMR spectrum (500 MHz) of [1-2H]·2PF<sub>6</sub> (6.3 mM) in the absence (lower) and presence (upper) of **P5A** host (6.6 mM) in acetone-*d*<sub>6</sub> and DMSO-*d*<sub>6</sub> (3:7, v:v).

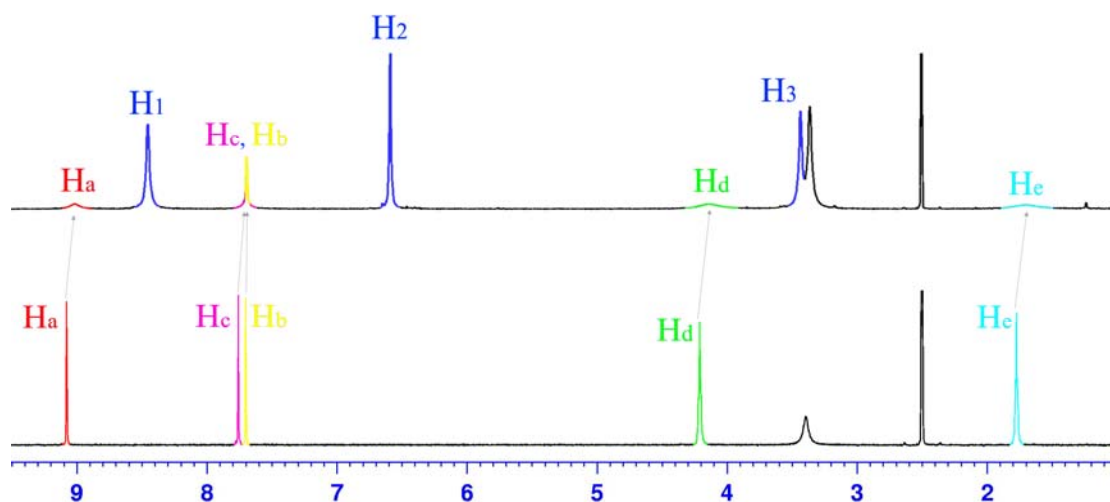

**Figure S11.** <sup>1</sup>H NMR spectrum (500 MHz) of [1-2H]·2PF<sub>6</sub> (6.2 mM) in the absence (lower) and presence (upper) of **P5A** host (6.5 mM) in DMSO-*d*<sub>6</sub>.

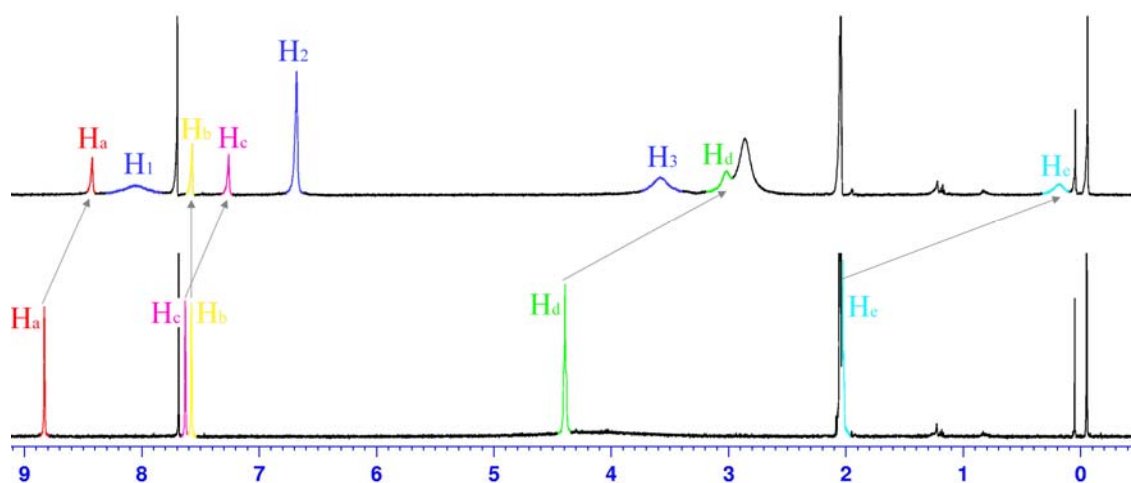

**Figure S12.** <sup>1</sup>H NMR spectrum (500 MHz) of [1-2H]·2PF<sub>6</sub> (4.4 mM) in the absence (lower) and presence (upper) of **P5A** host (4.1 mM) in acetone-*d*<sub>6</sub> and CDCl<sub>3</sub> (1:1, v:v).

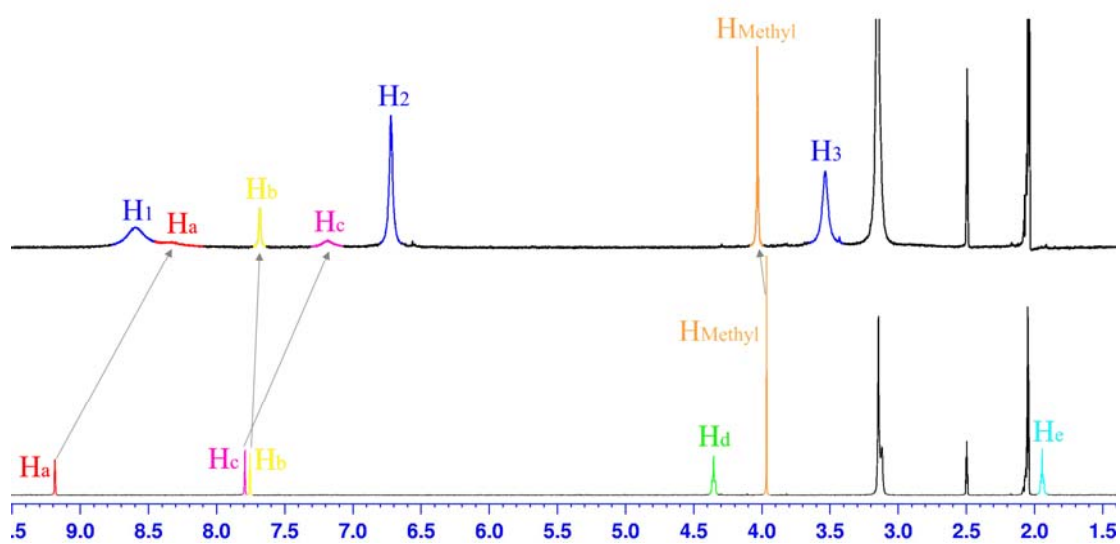

**Figure S13.** <sup>1</sup>H NMR spectrum (500 MHz) of **2**·2PF<sub>6</sub> (6.3 mM) in the absence (lower) and presence (upper) of **P5A** host (6.7 mM) in acetone-*d*<sub>6</sub> and DMSO-*d*<sub>6</sub> (3:2, v:v).

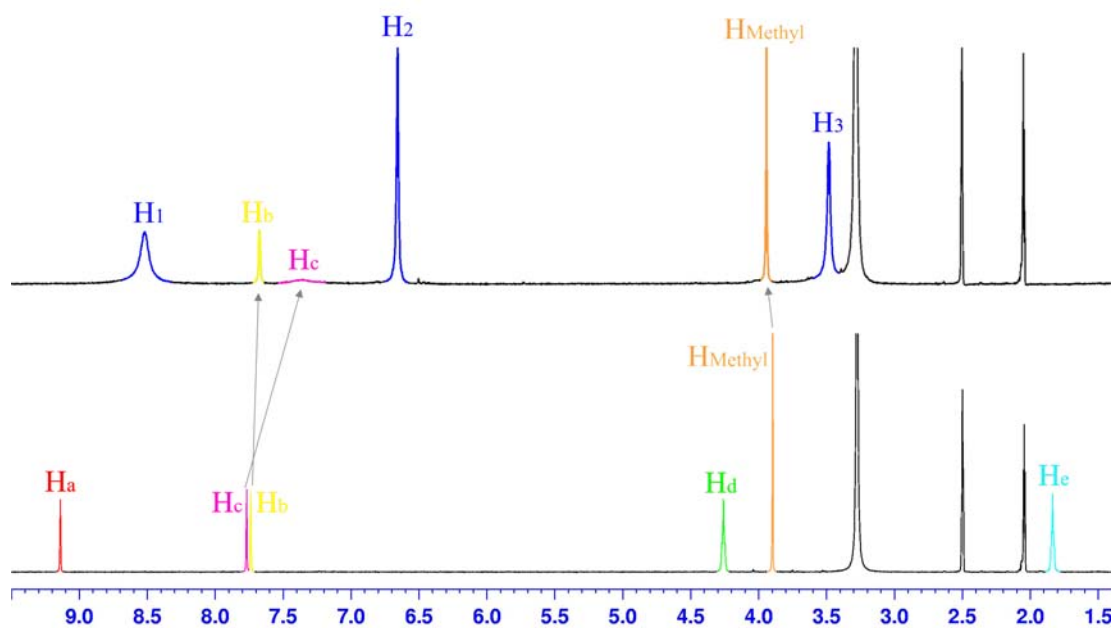

**Figure S14.** <sup>1</sup>H NMR spectrum (500 MHz) of 2·2PF<sub>6</sub> (5.8 mM) in the absence (lower) and presence (upper) of P5A host (6.3 mM) in acetone-*d*<sub>6</sub> and DMSO-*d*<sub>6</sub> (3:7, v:v).

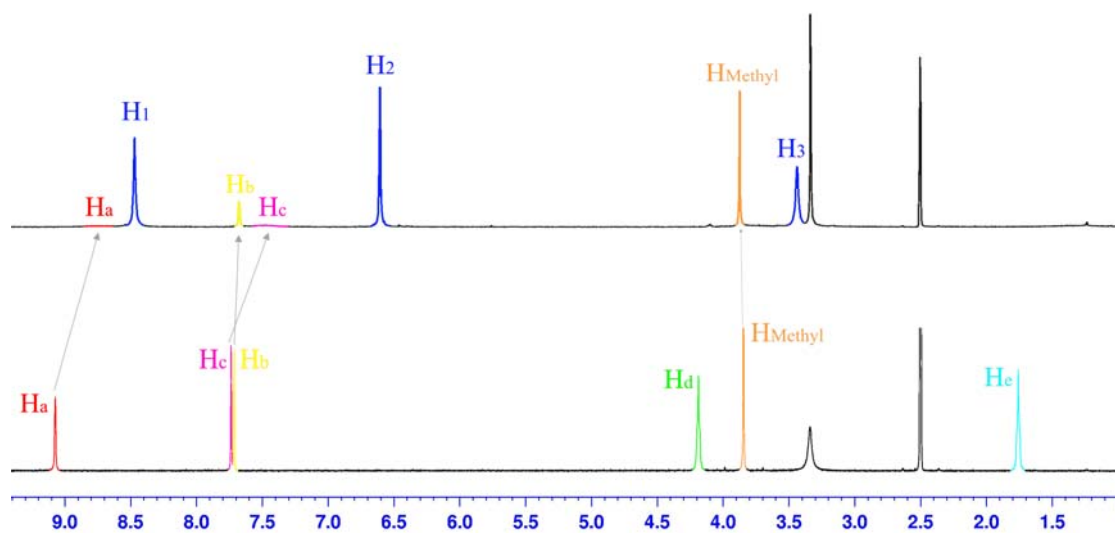

**Figure S15.** <sup>1</sup>H NMR spectrum (500 MHz) of 2·2PF<sub>6</sub> (6.0 mM) in the absence (lower) and presence (upper) of P5A host (6.0 mM) in DMSO-*d*<sub>6</sub>.

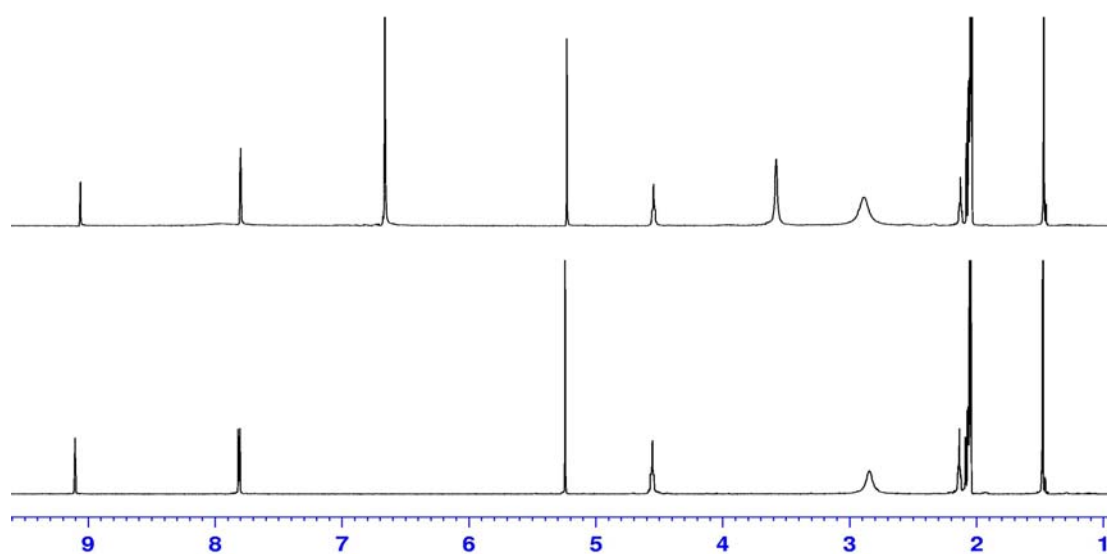

**Figure S16.**  $^1\text{H}$  NMR spectrum (500 MHz) of  $3 \cdot 2\text{PF}_6$  (5.9 mM) in the absence (lower) and presence (upper) of **P5A** host (6.9 mM) in acetone- $d_6$ .

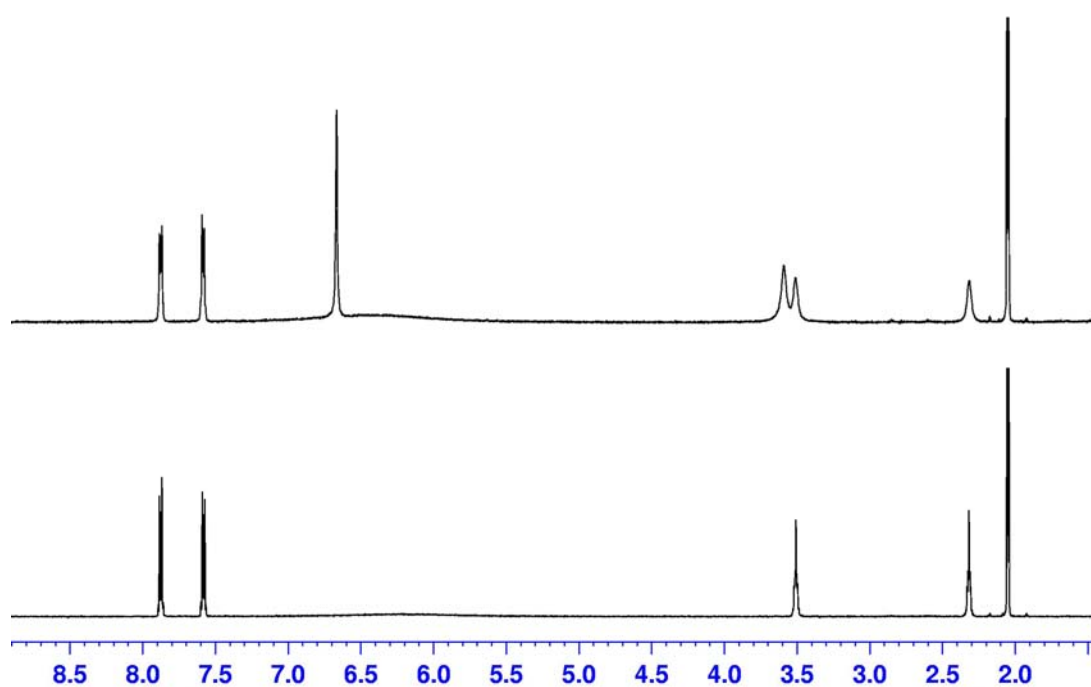

**Figure S17.**  $^1\text{H}$  NMR spectrum (500 MHz) of  $\text{BBIImB} \cdot 2\text{PF}_6$  (4.8 mM) in the absence (lower) and presence (upper) of **P5A** host (4.7 mM) in acetone- $d_6$ .

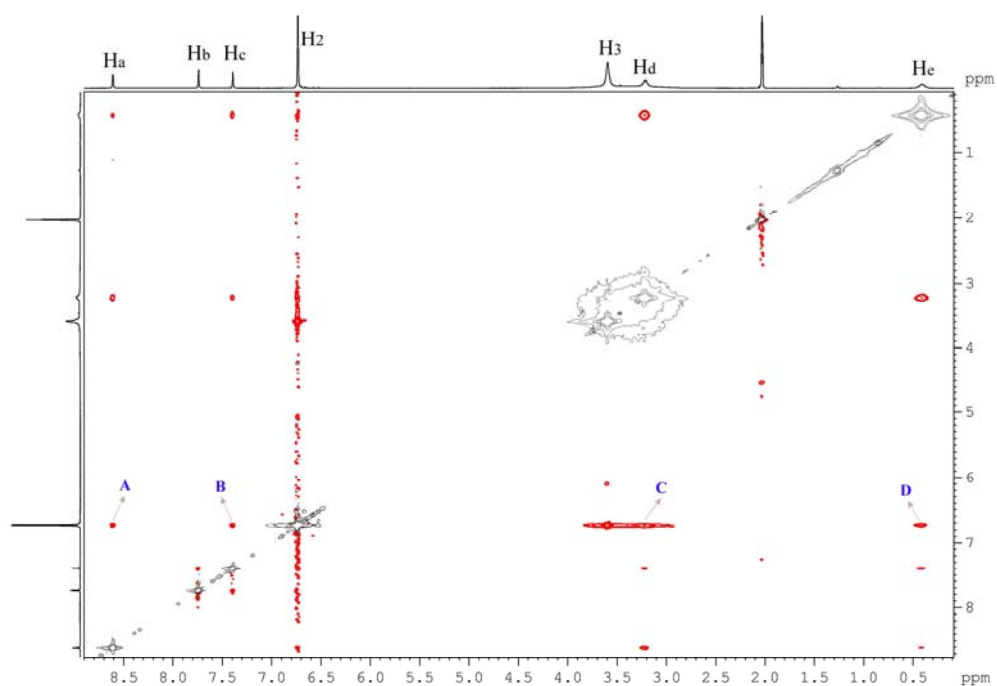

**Figure S18.** 2D NOESY analysis of  $[1-2H]\bullet 2PF_6$  with **P5A** in acetone- $d_6$  with a mixing time of 600 ms at 25 °C. The concentrations of both host and guest are about 10 mM.

### DOSY spectra.

Diffusion-ordered spectroscopy (DOSY) NMR experiments were performed to demonstrate the pseudorotaxane formation and the pH-controllable dethreading/rethreading process. The corresponding spectra were shown in Figure S19. Upon addition of **P5A** host, the diffusion coefficient of  $[\mathbf{1-2H}]^{2+}$  ( $D_{\text{guest}}$ ) in 3:2 acetone- $d_6$ :DMSO- $d_6$  decreased from  $6.61 \times 10^{-10}$  to  $5.81 \times 10^{-10} \text{ m}^2 \cdot \text{s}^{-1}$ , although it is not completely reduced to that of the macrocycle ( $4.97 \times 10^{-10} \text{ m}^2 \cdot \text{s}^{-1}$ ). This confirms the formation of host-guest complex with a free/bound equilibrium. Taking into account that the studied system is under fast equilibrium on NMR scale, the diffusion coefficients for the guest are the average values of the free and bound species. It should also be pointed out that  $H_a$ ,  $H_c$ ,  $H_d$  and  $H_e$  signals of the guest in the presence of **P5A** can not be observed in the DOSY spectrum due to the very remarkable complexation-induced broadening effects. (Figure S19c) On the other hand, the diffusion coefficient of **P5A** did not change very much. It's well known that the diffusion coefficient depends on the shape and size of the molecules.  $[\mathbf{1-2H}]^{2+}$  is significantly smaller than **P5A** and the guest is mostly trapped in the cavity of the host, without significantly affecting the size and shape of the **P5A** host. Therefore, it is reasonable that the diffusion coefficient of the **P5A** host is not greatly perturbed upon complexation with the axle.<sup>[S8]</sup> Using the well-established methodology<sup>[S8e,f, S9]</sup>, we can estimate the association constant ( $K_a \approx 250 \text{ M}^{-1}$ ), which is in agreement with the value determined through the NMR titration and the indirect NMR methods (Table 1 & S1).

Upon addition of  $\sim 2.2$  eq. of  $n\text{-Bu}_3\text{N}$ ,  $D_{\text{guest}}$  increases to  $9.77 \times 10^{-10} \text{ m}^2\cdot\text{s}^{-1}$  (resembling the value of free guest) showing that guest **1** has been released from the cavity of **P5A**. Upon addition of  $\text{CF}_3\text{COOH}$  again, the  $D_{\text{guest}}$  value ( $5.84 \times 10^{-10} \text{ m}^2\cdot\text{s}^{-1}$ ) restore the original value, indicating the rethreading process.

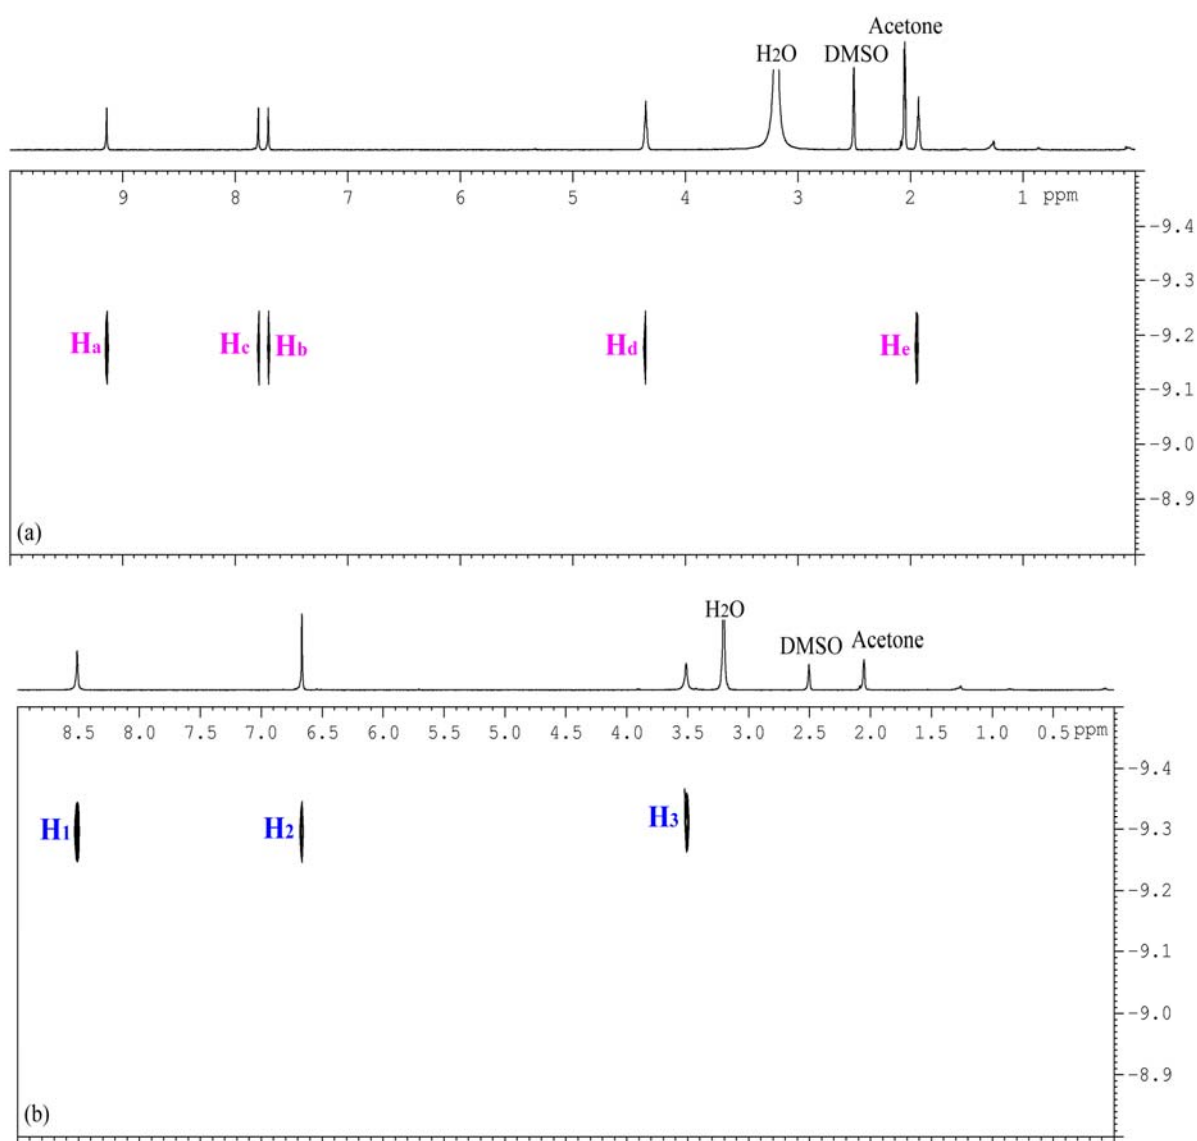



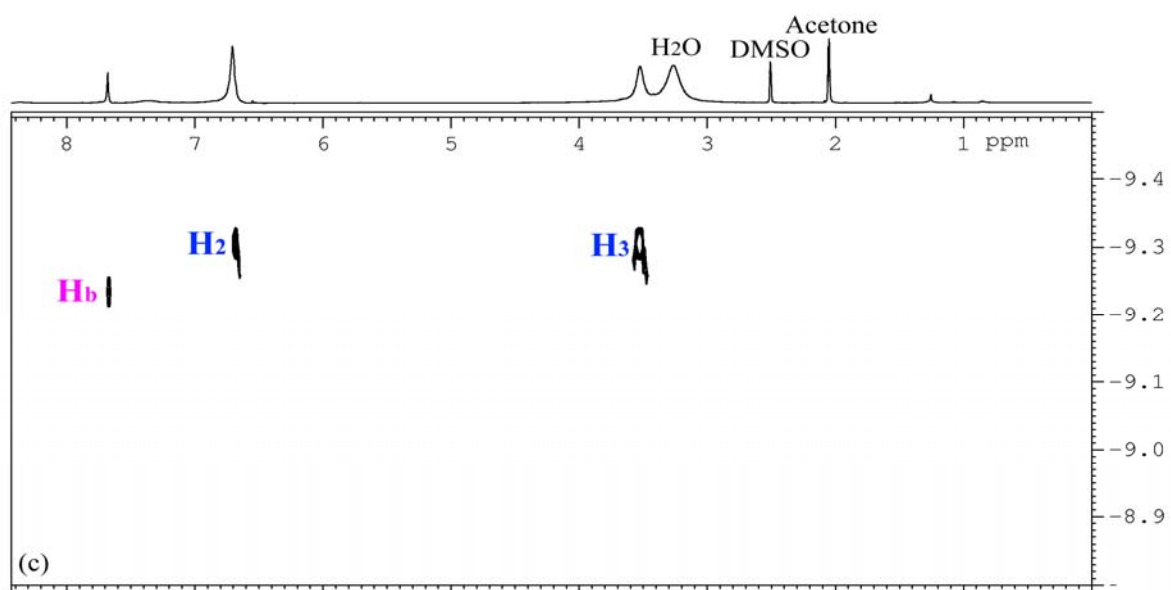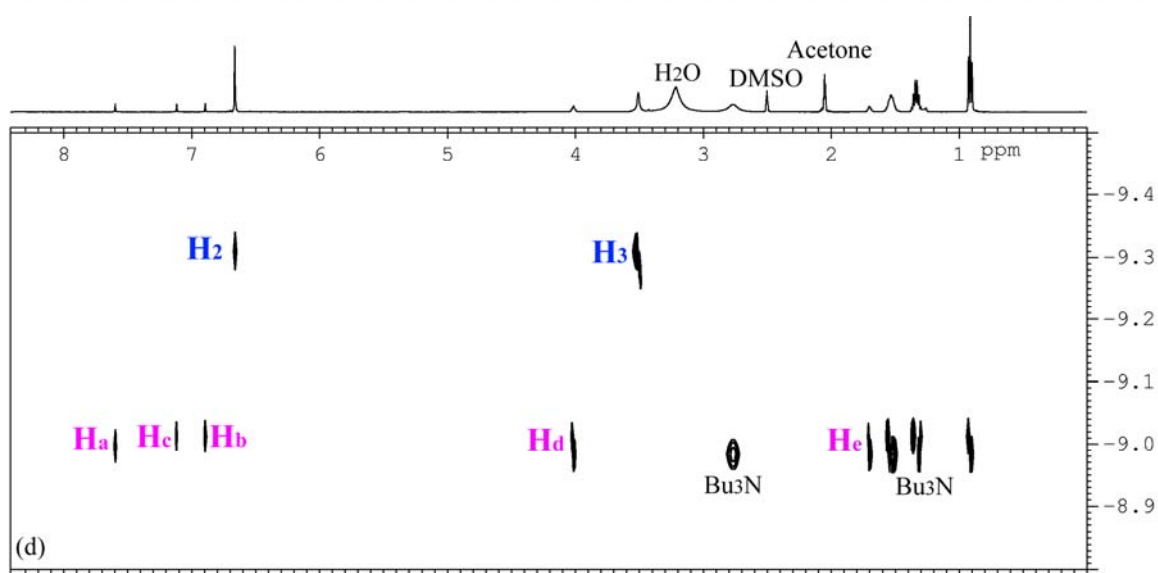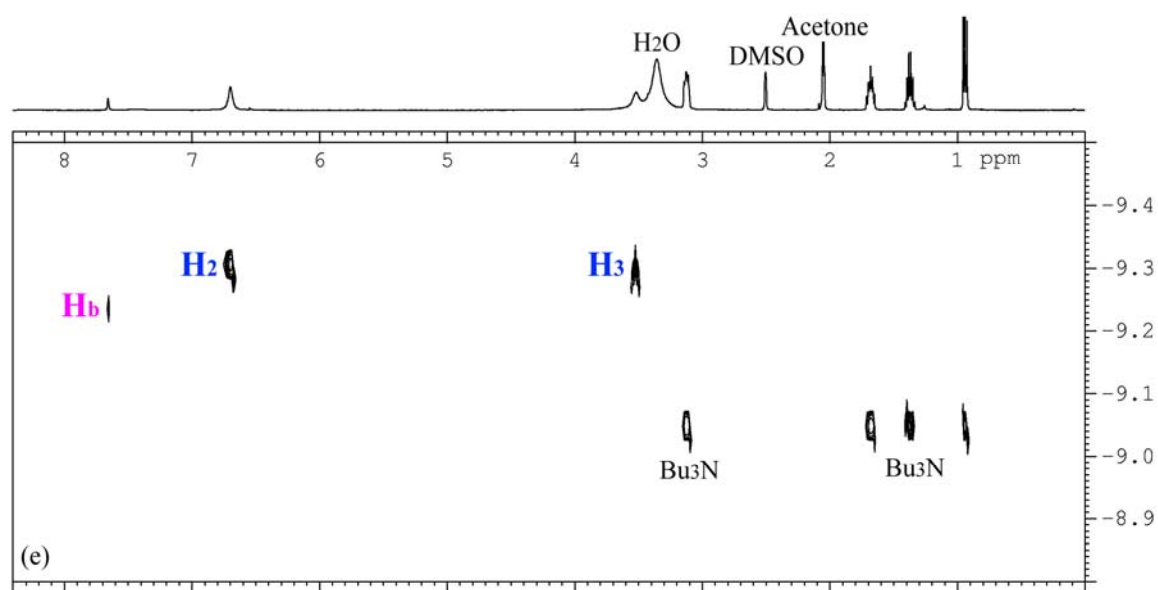

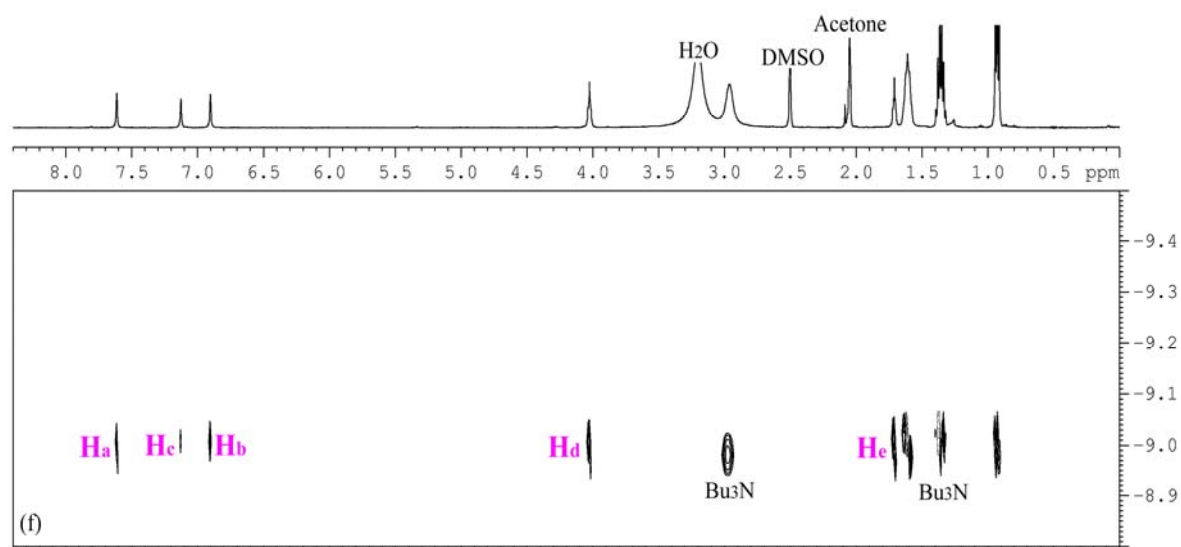

**Fingre S19.** DOSY spectra of (a)  $[1\text{-}2\text{H}]\cdot 2\text{PF}_6$ , (b) **P5A**, (c) **P5A** +  $[1\text{-}2\text{H}]\cdot 2\text{PF}_6$ , (d) **P5A** +  $[1\text{-}2\text{H}]\cdot 2\text{PF}_6$  + *n*-Bu<sub>3</sub>N, (e) **P5A** +  $[1\text{-}2\text{H}]\cdot 2\text{PF}_6$  + *n*-Bu<sub>3</sub>N + CF<sub>3</sub>COOH, (f)  $[1\text{-}2\text{H}]\cdot 2\text{PF}_6$  + *n*-Bu<sub>3</sub>N, in 3:2 (v:v) acetone-*d*<sub>6</sub>:DMSO-*d*<sub>6</sub> at 25°C. The concentrations of **P5A** and  $[1\text{-}2\text{H}]\cdot 2\text{PF}_6$  were 6.2–6.8 mM; the concentrations of *n*-Bu<sub>3</sub>N and CF<sub>3</sub>COOH were 13.6–14.5 mM.

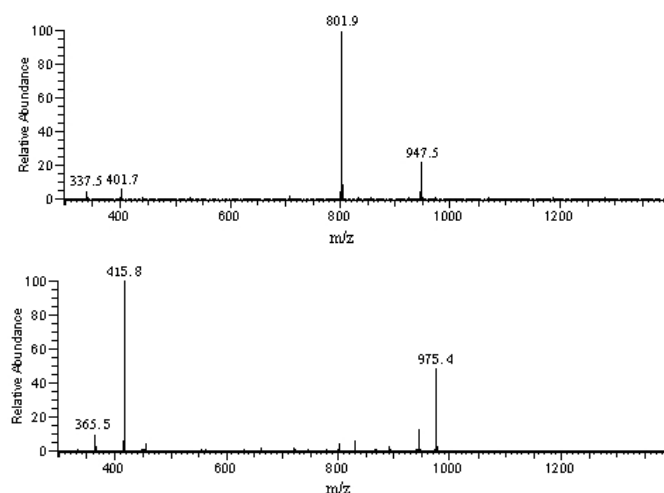

**Figure S20.** ESI mass spectra of  $[1\text{-}2\text{H}]\cdot 2\text{PF}_6$  (upper) and  $2\cdot 2\text{PF}_6$  (lower) in the presence of 1.2 eq **P5A** in methanol solution.

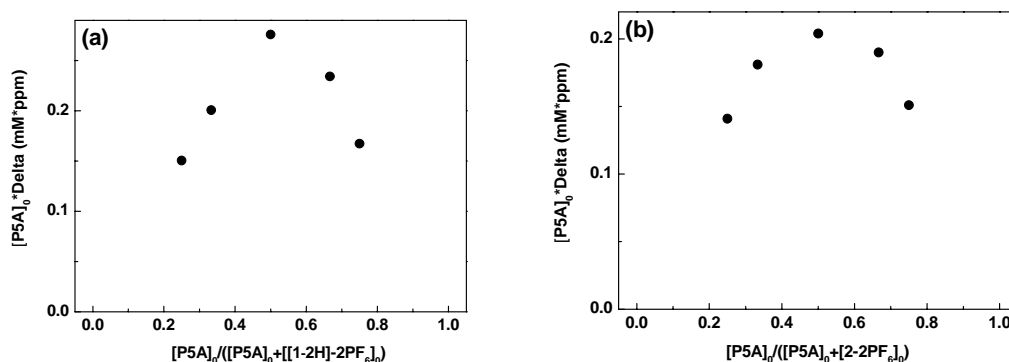

**Figure S21.** Job plots showing the 1:1 stoichiometries of the complexes between **P5A** and **[1-2H]·2PF<sub>6</sub>** in acetone-*d*<sub>6</sub> (a) and between **P5A** and **2·2PF<sub>6</sub>** in 3:2 acetone-*d*<sub>6</sub>:DMSO-*d*<sub>6</sub> (b). For all solutions, the sum of initial concentrations of the **P5A** host and bis(imidazolium) guest was 8.0 mM. Delta is the chemical shift change for H2 of **P5A**.

#### Determination of the association constants.

(1). To determine the association constant ( $K_a$ ), NMR titrations were done with solutions which had a constant concentration of **P5A** and varying concentrations of guest. Using the nonlinear curve-fitting method, the association constant was obtained for each host-guest combination from the following equation<sup>S10</sup>:

$$A = (A_{\infty} / [P5A]_0) (0.5[G]_0 + 0.5([P5A]_0 + 1/K_a) - (0.5([G]_0^2 + (2[G]_0(1/K_a - [P5A]_0)) + (1/K_a + [P5A]_0)^2)^{0.5}))$$

Where  $A$  is the chemical shift change of H2 on **P5A** host at  $[G]_0$ ,  $A_{\infty}$  is the chemical shift change of H2 when the host is completely complexed,  $[P5A]_0$  is the fixed initial concentration of the host, and  $[G]_0$  is the initial concentration of guest.

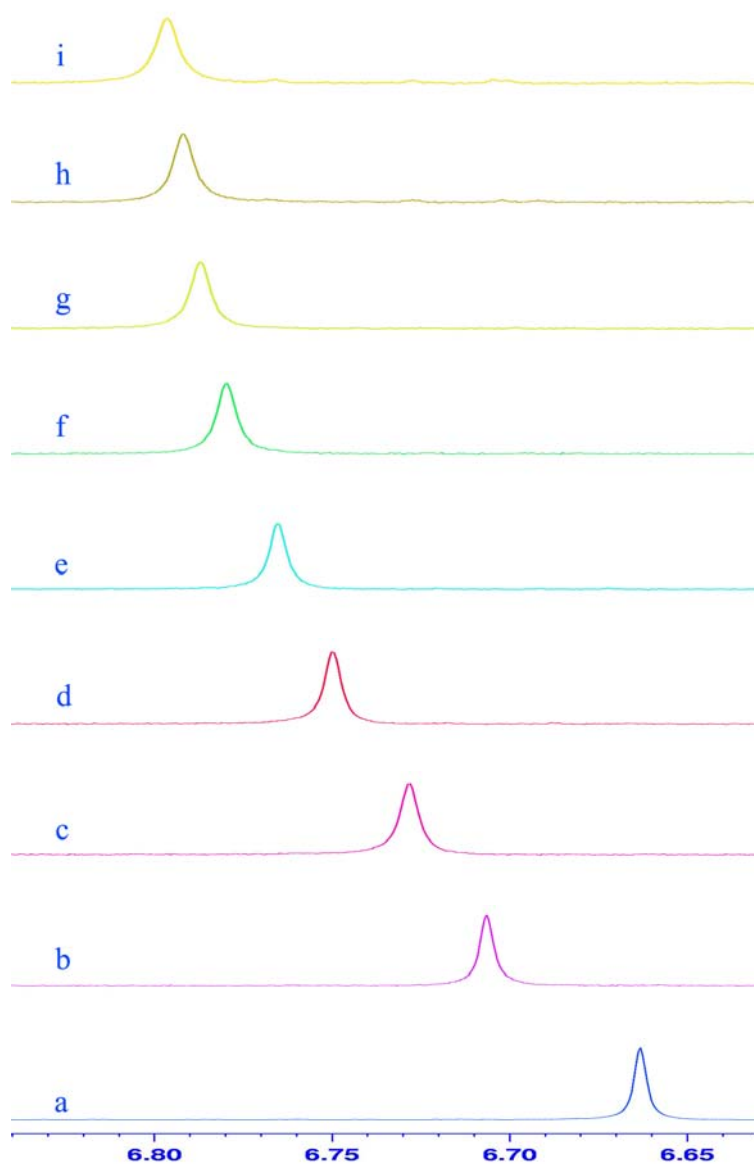

**Figure S22.** Partial <sup>1</sup>H NMR spectra (500 MHz, acetone-*d*<sub>6</sub>, 25°C) of **P5A** at a concentration of 1.2 mM upon addition of [1-2H]·2PF<sub>6</sub>: (a) 0 mM, (b) 1.1 mM, (c) 2.4 mM, (d) 3.9 mM, (e) 5.9 mM, (f) 8.4 mM, (g) 10.6 mM, (h) 12.9 mM, and (i) 17.5 mM.

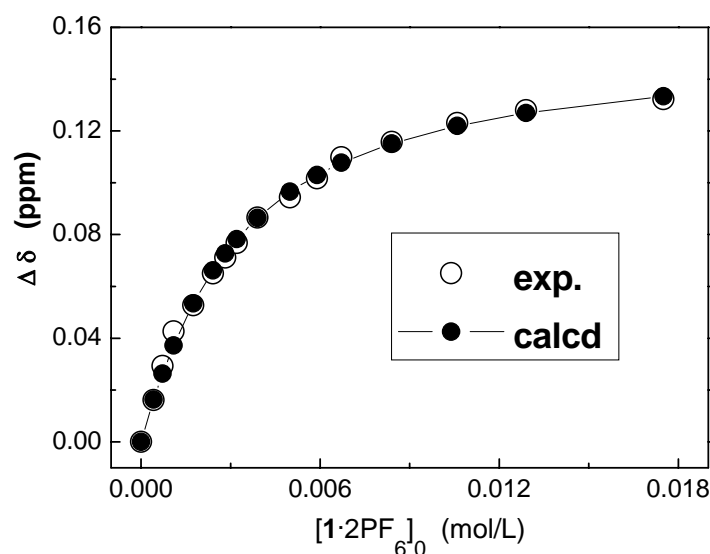

**Figure S23.** The non-linear curve-fitting (NMR titrations) for the complexation of **P5A** host (1.2 mM) with [1-2H]·2PF<sub>6</sub> in acetone-*d*<sub>6</sub> at 25°C. The concentration of 1·2PF<sub>6</sub> was 0, 0.4, 0.7, 1.1, 1.8, 2.4, 2.8, 3.2, 3.9, 5.0, 5.9, 6.7, 8.4, 10.6, 12.9, 17.5 mM.

The  $K_a$  values of [1-2H]·2PF<sub>6</sub> and 2·2PF<sub>6</sub> by **P5A** in different solvents are listed in Table 1 & 2 in the manuscript.

(2). The association constants ( $K_a$ ) have also been determined using the indirect method.<sup>S11</sup> A previously reported guest 1,3-bis(4,4'-dipyridyl)propane bis(hexafluorophosphate) (**G<sub>ref</sub>**·2PF<sub>6</sub>, see ref S12 and Fig. S24) that exhibits slow exchange kinetics and an excess of [1-2H]·2PF<sub>6</sub> or 2·2PF<sub>6</sub> are allowed to compete for a limiting quantity of **P5A**. The association constants between **G<sub>ref</sub>**·2PF<sub>6</sub> and **P5A** are  $(1.2 \pm 0.2) \times 10^2$ ,<sup>S12</sup>  $(2.0 \pm 0.3) \times 10^2$ , and  $(1.0 \pm 0.2) \times 10^3$  M<sup>-1</sup> in DMSO-*d*<sub>6</sub>, 3:7 acetone-*d*<sub>6</sub>:DMSO-*d*<sub>6</sub>, and 3:2 acetone-*d*<sub>6</sub>:DMSO-*d*<sub>6</sub> respectively. Although 2·2PF<sub>6</sub>

has good solubility in acetone- $d_6$  and 1:1 acetone- $d_6$ :CDCl<sub>3</sub>, precipitation occurred immediately when mixing it and **P5A**. Therefore, the  $K_a$  values of **G<sub>ref</sub>** and **P5A** can't be determined in these two solvents.

The integration of the resonances for the free and bound guest then allow for a calculation of the association constant. In the three component system:

$$K_{a \text{ ref}} = \frac{[\text{P5A} \cdot \text{G}_{\text{ref}}]_{\text{c}}}{[\text{P5A}]_{\text{uc}}[\text{G}_{\text{ref}}]_{\text{uc}}}$$

$$\therefore [\text{P5A}]_{\text{uc}} = \frac{[\text{P5A} \cdot \text{G}_{\text{ref}}]_{\text{c}}}{[\text{G}_{\text{ref}}]_{\text{uc}} K_{a \text{ ref}}}$$

So the unknown  $K_a$  could be determined using the following equation:

$$K_a = \frac{[\text{P5A} \cdot \text{G}]_{\text{c}}}{[\text{P5A}]_{\text{uc}}[\text{G}]_{\text{uc}}} = \frac{[\text{P5A}]_0 - [\text{P5A}]_{\text{uc}} - [\text{P5A} \cdot \text{G}_{\text{ref}}]_{\text{c}}}{[\text{P5A}]_{\text{uc}}([\text{G}]_0 - [\text{P5A} \cdot \text{G}]_{\text{c}})}$$

$$= \frac{[\text{P5A}]_0 - [\text{P5A}]_{\text{uc}} - [\text{P5A} \cdot \text{G}_{\text{ref}}]_{\text{c}}}{[\text{P5A}]_{\text{uc}}\{[\text{G}]_0 - ([\text{P5A}]_0 - [\text{P5A}]_{\text{uc}} - [\text{P5A} \cdot \text{G}_{\text{ref}}]_{\text{c}})\}}$$

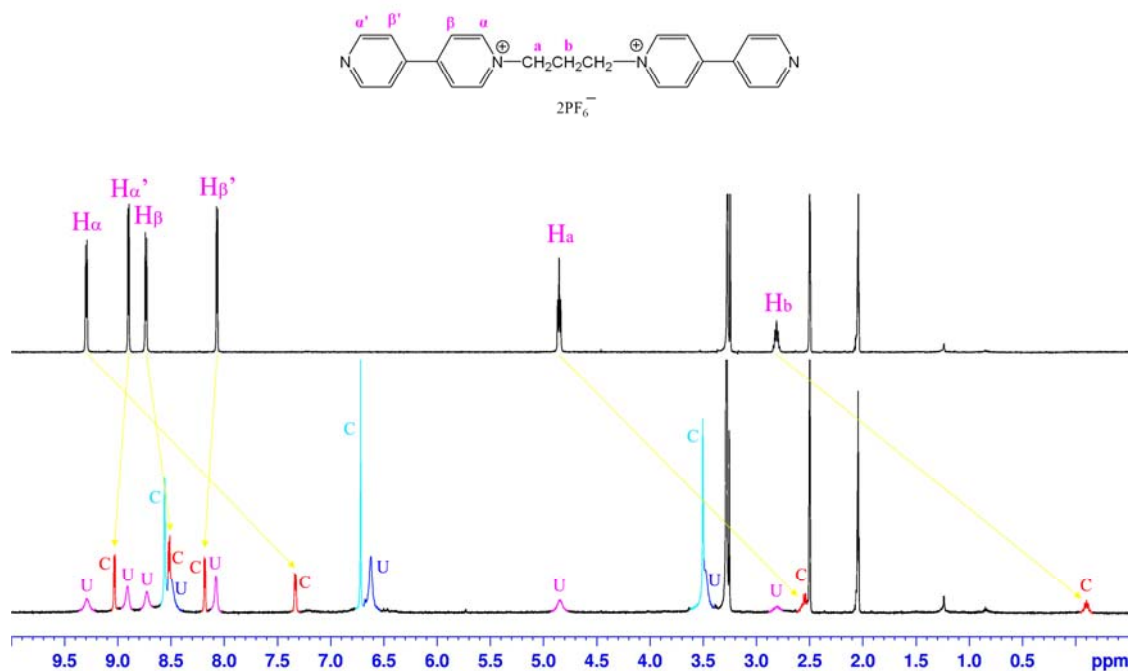

**Figure S24.**  $^1\text{H}$  NMR spectrum (500 MHz) of  $\text{G}_{\text{ref}}\cdot 2\text{PF}_6$  (6.0 mM) in the absence (upper) and presence (lower) of **P5A** host (6.2 mM) in acetone- $d_6$  and DMSO- $d_6$  (3:7, v:v).

As shown in Table S1, the  $K_a$  values for **P5A** with  $[\mathbf{1}\text{-}2\text{H}]\cdot 2\text{PF}_6$  and  $\mathbf{2}\cdot 2\text{PF}_6$  systems determined using the indirect method are almost accordant with those from NMR titration.

**TABLE S1.** Association constant ( $K_a/\text{M}^{-1}$ ) for complexation of host **P5A** with  $[\mathbf{1}\text{-}2\text{H}]\cdot 2\text{PF}_6$  and  $\mathbf{2}\cdot 2\text{PF}_6$  at 25°C using different methods.

| Guest                                             | Solvent <sup>a</sup>                  | $K_a$ <sup>b</sup>         | $K_a$ <sup>c</sup> |
|---------------------------------------------------|---------------------------------------|----------------------------|--------------------|
| $[\mathbf{1}\text{-}2\text{H}]\cdot 2\text{PF}_6$ | DMSO- $d_6$                           | $(5.5\pm 0.2) \times 10$   | <sup>d</sup>       |
| $[\mathbf{1}\text{-}2\text{H}]\cdot 2\text{PF}_6$ | acetone- $d_6$ :DMSO- $d_6$ 3:7       | $(1.2\pm 0.4) \times 10^2$ | $1.4 \times 10^2$  |
| $[\mathbf{1}\text{-}2\text{H}]\cdot 2\text{PF}_6$ | acetone- $d_6$ :DMSO 3:2              | $(2.7\pm 0.3) \times 10^2$ | $2.6 \times 10^2$  |
| $[\mathbf{1}\text{-}2\text{H}]\cdot 2\text{PF}_6$ | acetone- $d_6$                        | $(4.6\pm 0.6) \times 10^2$ | <sup>e</sup>       |
| $[\mathbf{1}\text{-}2\text{H}]\cdot 2\text{PF}_6$ | acetone- $d_6$ :CDCl <sub>3</sub> 1:1 | $(3.1\pm 0.5) \times 10^3$ | <sup>e</sup>       |
| $\mathbf{2}\cdot 2\text{PF}_6$                    | DMSO- $d_6$                           | $(1.4\pm 0.2) \times 10^2$ | $1.5 \times 10^2$  |
| $\mathbf{2}\cdot 2\text{PF}_6$                    | acetone- $d_6$ :DMSO- $d_6$ 3:7       | $(3.3\pm 0.4) \times 10^2$ | $3.8 \times 10^2$  |
| $\mathbf{2}\cdot 2\text{PF}_6$                    | acetone- $d_6$ :DMSO- $d_6$ 3:2       | $(1.0\pm 0.2) \times 10^3$ | $1.3 \times 10^3$  |
| $\mathbf{2}\cdot 2\text{PF}_6$                    | acetone- $d_6$                        | <sup>f</sup>               | <sup>e, f</sup>    |
| $\mathbf{2}\cdot 2\text{PF}_6$                    | acetone- $d_6$ :CDCl <sub>3</sub> 1:1 | <sup>f</sup>               | <sup>e, f</sup>    |

<sup>a</sup> v:v. <sup>a</sup> NMR titration. <sup>b</sup> The indirect method. <sup>d</sup> The  $K_a$  value was too small ( $< 80 \text{ M}^{-1}$ )

to be calculated accurately using the indirect method.<sup>e</sup> Could not be determined due to the poor solubility of the **P5A-G<sub>ref</sub>**·2PF<sub>6</sub> complex in these solvents.<sup>f</sup> Could not be determined due to the poor solubility of the **P5A**-[**1-2H**]·2PF<sub>6</sub> or **P5A-2**·2PF<sub>6</sub> complex in these solvents.

## References.

[S1] According to 1,4-dimethoxy**P5A**'s X-ray crystal structure, the diameter of the cavity of **P5A** was calculated to ca. 5 Å, (T. Ogoshi, S. Kanai, S. Fujinami, T. Yamagishi and Y. Nakamoto, *J. Am. Chem. Soc.* 2008, **130**, 5022–5023) which was similar with the largest H–H longitudinal distance in **BBIImB** dication (~ 5.0 Å) and larger than that in 1,4-bis(pyridinium)butane (~ 4.8 Å) and [**1-2H**]<sup>2+</sup> (~4.7 Å). (Fig. S1)

[S2] It should be noted that suitable benzimidazolium derivative, 1,2-bis(benzimidazolium)ethane dications, can thread through the cavity of a larger dibenzo-24-crown-8 macrocycle (around 6.0 Å, ref S3 ) to form [2]pseudorotaxanes. (ref S3)

[S3] Cavity size of dibenzo-24-crown-8 macrocycle was estimated to be around 6 Å by taking into consideration the narrowest portion of the macrocycle. See: P. R. Ashton, P. J. Campbell, E. J. T. Chrystal, P. T. Glink, S. Menzer, D. Philp, N. Spencer, J. F. Stoddart, P. A. Tasker and D. J. Williams, *Angew. Chem. Int. Ed.*, 1995, **34**, 1865–1869.

[S4] (a) L. Li and G. J. Clarkson, *Org. Lett.*, 2007, **9**, 497–500; (b) D. Castillo, P. Astudillo, J. Mares, F. J. González, A. Vela and J. Tiburcio, *Org. Biomol. Chem.*, 2007, **5**, 2252–2256.

[S5] J.-F. Ma, J. Yang, G.-L. Zheng, L. Li and J.-F. Liu, *Inorg. Chem.* 2003, **42**,



7531–7534.

[S6] F. M. Nachtigall, Y. E. Corilo, C. C. Cassol, G. Ebeling, N. H. Morgon, J. Dupont and M. N. Eberlin, *Angew Chem Int Ed Engl.*, 2008, **47**, 151–154.

[S7] (a) P. C. Vyas, C. K. Oza and A. K. Goyal, *Chem. Ind.* 1980, 287–288; (b) C. J. Matthews, V. Broughton, G. Bernardinelli, X. Melich, G. Brand, A. C. Willis and A. F. Williams, *New J. Chem.* 2003, **27**, 354–358.

[S8] (a) J. Mattsson, O. Zava, A. K. Renfrew, Y. Sei, K. Yamaguchi, P. J. Dysonb and B. Therrien, *Dalton Trans.*, 2010, **39**, 8248–8255; (b) S. A. Fernandes, L. F. Cabec, A. J. Marsaioli and E. de Paula, *J Incl Phenom Macrocycl Chem*, 2007, **57**, 395–401; (c) N. Jayaraj, Y. Zhao, A. Parthasarathy, M. Porel, R. S. H. Liu and V. Ramamurthy, *Langmuir*, 2009, **25**, 10575–10586; (d) C. Jullian, S. Miranda, G. Zapata-Torres, F. Mendizabal and C. Olea-Azarb, *Bioorg. Med. Chem.*, 2007, **15**, 3217–3224; (e) D. L. da Silva, E. do C. Tavares, L. de S. Conegero, A. de Fatima, R. A. Pilli and S. A. Fernandes, *J. Incl. Phenom. Macrocycl. Chem.*, DOI 10.1007/s10847-010-9825-1; (f) R. Wimmer; F. L. Aachmann, K. L. Larsen and S. B. Petersen, *Carbohydr. Res.* 2002, **337**, 841–849.

[S9] (a) R. Rymden, J. Carlfors and P. Stilbs, *J. Incl. Phenom. Macrocycl. Chem.*, 1983, **1**, 159–167; (b) J. S. Gounarides, A. Chen and M. J. Shapiro, *J. Chromatogr. B*, 1999, **725**, 79–90; (c) J. Xu, T. Tan, L. Kenneb and C. Sandstrom, *New J. Chem.*, 2009, **33**, 1057–1063; (d) D. A. Stauffer, R. E. Barrans and D. A. Dougherty, *J. Org. Chem.*, 1990, **55**, 2762–2767; (e) K. S. Cameron and L. Fielding, *J. Org. Chem.*, 2001, **66**, 6891–6895.

[S10] (a) K. A. Connors, *Binding Constants*; Wiley: New York, 1987. Corbin, P. S.

- Ph.D. Dissertation, University of Illinois at Urbana-Champaign, Urbana, IL, 1999; (b) R. P. Ashton, R. Ballardini, V. Balzani, M. Belohradsky, M. T. Gandolfi, D. Philp, L. Prodi, F. M. Raymo, M. V. Reddington, N. Spencer, J. F. Stoddart, M. Venturi and D. J. Williams, *J. Am. Chem. Soc.*, 1996, **118**, 4931–4951; (c) Y. Inoue, K. Yamamoto, T. Wada, S. Everitt, X.-M. Gao, Z.-J. Hou, L.-H. Tong, S.-K. Jiang and H.-M. Wu, *J. Chem. Soc., Perkin Trans. 2*, 1998, 1807–1816.
- [S11] (a) W. L. Mock and N. Y. Shih, *J. Org. Chem.* 1986, **51**, 4440–4446; (b) S. Liu, C. Ruspic, P. Mukhopadhyay, S. Chakrabarti, P. Y. Zavalij and L. Isaacs, *J. Am. Chem. Soc.*, 2005, **127**, 15959–15967; (c) R. E. Heath, G. M. Dykes, H. Fish and D. K. Smith, *Chem. Eur. J.*, 2003, **9**, 850–855.
- [S12] C. Li, Q. Xu, J. Li, F. Yao and X. Jia, *Org. Biomol. Chem.*, 2010, **8**, 1568–1576.
